# Supplementary material
Source: publisher site journal article supplement (https://www.spandidos-publications.com/4606/downloadSupplementary)
Supplement: Supplementary file 1 [file downloadSupplementary]

## Sheet: Sheet 1
Table SXI. KEGG analysis up specific
KEGG_A_class	KEGG_B_class	Pathway	out (59)	All (8312)	Pvalue	Qvalue	Pathway ID	Genes	K_IDs
Organismal Systems	Nervous system	Serotonergic synapse	4	116	0.00908674	0.609745	ko04726	ENSG00000102468;ENSG00000166206;ENSG00000145864;ENSG00000179546	K04157+K05181+K05181+K04153
Metabolism	Carbohydrate metabolism	Inositol phosphate metabolism	3	75	0.0159823	0.609745	ko00562	ENSG00000127080;ENSG00000063601;ENSG00000168918	K10572+K18081+K03084
Metabolism	Metabolism of cofactors and vitamins	Biotin metabolism	1	3	0.0211462	0.609745	ko00780	ENSG00000159267	K01942
Genetic Information Processing	Folding, sorting and degradation	SNARE interactions in vesicular transport	2	36	0.0267384	0.609745	ko04130	ENSG00000099940;ENSG00000135823	K08509+K08498
Human Diseases	Substance dependence	Nicotine addiction	2	41	0.0340279	0.609745	ko05033	ENSG00000166206;ENSG00000145864	K05181+K05181
Environmental Information Processing	Signal transduction	Phosphatidylinositol signaling system	3	102	0.0355521	0.609745	ko04070	ENSG00000127080;ENSG00000063601;ENSG00000168918	K10572+K18081+K03084
Environmental Information Processing	Signaling molecules and interaction	Neuroactive ligand-receptor interaction	6	352	0.0377718	0.609745	ko04080	ENSG00000102468;ENSG00000166206;ENSG00000122420;ENSG00000282608;ENSG00000145864;ENSG00000179546	K04157+K05181+K04262+K04268+K05181+K04153
Organismal Systems	Endocrine system	GnRH secretion	2	67	0.0816962	0.846861	ko04929	ENSG00000143603;ENSG00000187486	K04944+K05004
Cellular Processes	Transport and catabolism	Autophagy - animal	3	149	0.0888703	0.846861	ko04140	ENSG00000025039;ENSG00000099940;ENSG00000085978	K16186+K08509+K17890
Environmental Information Processing	Signal transduction	Hippo signaling pathway	3	159	0.103009	0.846861	ko04390	ENSG00000128245;ENSG00000131899;ENSG00000186575	K16198+K06094+K16684
Metabolism	Lipid metabolism	Primary bile acid biosynthesis	1	17	0.114158	0.846861	ko00120	ENSG00000099377	K12408
Organismal Systems	Endocrine system	Insulin secretion	2	91	0.136135	0.846861	ko04911	ENSG00000143603;ENSG00000187486	K04944+K05004
Organismal Systems	Nervous system	GABAergic synapse	2	92	0.138554	0.846861	ko04727	ENSG00000166206;ENSG00000145864	K05181+K05181
Metabolism	Glycan biosynthesis and metabolism	Glycosaminoglycan biosynthesis - chondroitin sulfate / dermatan sulfate	1	21	0.139098	0.846861	ko00532	ENSG00000171310	K01017
Human Diseases	Substance dependence	Morphine addiction	2	96	0.14832	0.846861	ko05032	ENSG00000166206;ENSG00000145864	K05181+K05181
Metabolism	Glycan biosynthesis and metabolism	Glycosylphosphatidylinositol(GPI)-anchor biosynthesis	1	25	0.163347	0.846861	ko00563	ENSG00000112293	K01127
Metabolism	Carbohydrate metabolism	Ascorbate and aldarate metabolism	1	28	0.181092	0.846861	ko00053	ENSG00000156096	K00699
Environmental Information Processing	Signal transduction	Hippo signaling pathway - multiple species	1	29	0.186924	0.846861	ko04392	ENSG00000186575	K16684
Cellular Processes	Transport and catabolism	Autophagy - other eukaryotes	1	34	0.215479	0.846861	ko04136	ENSG00000085978	K17890
Metabolism	Carbohydrate metabolism	Pentose and glucuronate interconversions	1	35	0.221071	0.846861	ko00040	ENSG00000156096	K00699
Metabolism	Metabolism of cofactors and vitamins	Nicotinate and nicotinamide metabolism	1	38	0.237611	0.846861	ko00760	ENSG00000008130	K00858
Organismal Systems	Environmental adaptation	Thermogenesis	3	246	0.253688	0.846861	ko04714	ENSG00000240230;ENSG00000099956;ENSG00000203667	K18183+K11648+K18184
Metabolism	Amino acid metabolism	Glycine, serine and threonine metabolism	1	43	0.264415	0.846861	ko00260	ENSG00000179761	K00306
Metabolism	Metabolism of cofactors and vitamins	Porphyrin and chlorophyll metabolism	1	44	0.269663	0.846861	ko00860	ENSG00000156096	K00699
Genetic Information Processing	Replication and repair	Nucleotide excision repair	1	47	0.285189	0.846861	ko03420	ENSG00000111358	K03143
Genetic Information Processing	Replication and repair	Homologous recombination	1	47	0.285189	0.846861	ko03440	ENSG00000196584	K10879
Cellular Processes	Cellular community - eukaryotes	Signaling pathways regulating pluripotency of stem cells	2	150	0.288304	0.846861	ko04550	ENSG00000016082;ENSG00000114739	K09370+K13596
Human Diseases	Endocrine and metabolic diseases	Type II diabetes mellitus	1	50	0.30039	0.846861	ko04930	ENSG00000187486	K05004
Organismal Systems	Nervous system	Retrograde endocannabinoid signaling	2	155	0.301493	0.846861	ko04723	ENSG00000166206;ENSG00000145864	K05181+K05181
Environmental Information Processing	Signal transduction	Calcium signaling pathway	3	273	0.30609	0.846861	ko04020	ENSG00000102468;ENSG00000122420;ENSG00000183049	K04157+K04262+K08794
Metabolism	Amino acid metabolism	Arginine and proline metabolism	1	52	0.310347	0.846861	ko00330	ENSG00000116649	K00797
Metabolism	Amino acid metabolism	Cysteine and methionine metabolism	1	53	0.315273	0.846861	ko00270	ENSG00000116649	K00797
Human Diseases	Infectious diseases	Malaria	1	55	0.325022	0.846861	ko05144	ENSG00000005844	K05718
Genetic Information Processing	Transcription	Basal transcription factors	1	58	0.339389	0.846861	ko03022	ENSG00000111358	K03143
Human Diseases	Infectious diseases	Legionellosis	1	58	0.339389	0.846861	ko05134	ENSG00000152700	K07953
Metabolism	Metabolism of other amino acids	Glutathione metabolism	1	61	0.353456	0.846861	ko00480	ENSG00000116649	K00797
Organismal Systems	Digestive system	Mineral absorption	1	61	0.353456	0.846861	ko04978	ENSG00000136868	K14686
Cellular Processes	Cellular community - eukaryotes	Tight junction	2	176	0.356349	0.846861	ko04530	ENSG00000131899;ENSG00000186575	K06094+K16684
Organismal Systems	Nervous system	Long-term depression	1	62	0.358079	0.846861	ko04730	ENSG00000128266	K04535
Metabolism	Amino acid metabolism	Lysine degradation	1	64	0.367228	0.846861	ko00310	ENSG00000179761	K00306
Metabolism	Lipid metabolism	Steroid hormone biosynthesis	1	65	0.371755	0.846861	ko00140	ENSG00000156096	K00699
Organismal Systems	Endocrine system	Cortisol synthesis and secretion	1	66	0.376249	0.846861	ko04927	ENSG00000082482	K04913
Human Diseases	Infectious diseases	Herpes simplex infection	5	573	0.384693	0.846861	ko05168	ENSG00000160352;ENSG00000118620;ENSG00000263002;ENSG00000121406;ENSG00000197608	K09228+K09228+K09228+K09228+K09228
Metabolism	Metabolism of cofactors and vitamins	Retinol metabolism	1	68	0.385144	0.846861	ko00830	ENSG00000156096	K00699
Metabolism	Xenobiotics biodegradation and metabolism	Drug metabolism - cytochrome P450	1	70	0.393914	0.846861	ko00982	ENSG00000156096	K00699
Metabolism	Carbohydrate metabolism	Glycolysis / Gluconeogenesis	1	71	0.398252	0.846861	ko00010	ENSG00000159322	K08074
Metabolism	Xenobiotics biodegradation and metabolism	Metabolism of xenobiotics by cytochrome P450	1	75	0.415303	0.846861	ko00980	ENSG00000156096	K00699
Human Diseases	Drug resistance	Platinum drug resistance	1	75	0.415303	0.846861	ko01524	ENSG00000136868	K14686
Organismal Systems	Digestive system	Gastric acid secretion	1	77	0.42365	0.846861	ko04971	ENSG00000082482	K04913
Human Diseases	Infectious diseases	Pertussis	1	78	0.427779	0.846861	ko05133	ENSG00000150455	K05403
Genetic Information Processing	Folding, sorting and degradation	RNA degradation	1	79	0.43188	0.846861	ko03018	ENSG00000138035	K00962
Human Diseases	Cancers	Glioma	1	79	0.43188	0.846861	ko05214	ENSG00000183049	K08794
Metabolism	Xenobiotics biodegradation and metabolism	Drug metabolism - other enzymes	1	80	0.435951	0.846861	ko00983	ENSG00000156096	K00699
Human Diseases	Cancers	Viral carcinogenesis	2	209	0.43927	0.846861	ko05203	ENSG00000128245;ENSG00000111358	K16198+K03143
Organismal Systems	Sensory system	Taste transduction	1	81	0.439993	0.846861	ko04742	ENSG00000179546	K04153
Cellular Processes	Transport and catabolism	Peroxisome	1	86	0.459783	0.846861	ko04146	ENSG00000179761	K00306
Human Diseases	Cancers	Chemical carcinogenesis	1	86	0.459783	0.846861	ko05204	ENSG00000156096	K00699
Human Diseases	Infectious diseases	Salmonella infection	2	224	0.475102	0.846861	ko05132	ENSG00000114030;ENSG00000150455	K23940+K05403
Cellular Processes	Cellular community - eukaryotes	Gap junction	1	93	0.486339	0.846861	ko04540	ENSG00000102468	K04157
Environmental Information Processing	Signal transduction	TGF-beta signaling pathway	1	96	0.497323	0.846861	ko04350	ENSG00000114739	K13596
Organismal Systems	Endocrine system	Aldosterone synthesis and secretion	1	99	0.508076	0.846861	ko04925	ENSG00000183049	K08794
Human Diseases	Cancer: overview	PD-L1 expression and PD-1 checkpoint pathway in cancer	1	99	0.508076	0.846861	ko05235	ENSG00000150455	K05403
Organismal Systems	Sensory system	Inflammatory mediator regulation of TRP channels	1	103	0.522062	0.846861	ko04750	ENSG00000102468	K04157
Human Diseases	Infectious diseases	Shigellosis	2	251	0.53609	0.846861	ko05131	ENSG00000025039;ENSG00000085978	K16186+K17890
Organismal Systems	Immune system	Toll-like receptor signaling pathway	1	108	0.538996	0.846861	ko04620	ENSG00000150455	K05403
Organismal Systems	Endocrine system	Parathyroid hormone synthesis, secretion and action	1	109	0.542312	0.846861	ko04928	ENSG00000137270	K21598
Metabolism	Global and overview maps	Metabolic pathways	11	1554	0.557052	0.846861	ko01100	ENSG00000159267;ENSG00000156096;ENSG00000127080;ENSG00000099377;ENSG00000112293;ENSG00000063601;ENSG00000168918;ENSG00000159322;ENSG00000008130;ENSG00000179761;ENSG00000116649	K01942+K00699+K10572+K12408+K01127+K18081+K03084+K08074+K00858+K00306+K00797
Organismal Systems	Immune system	Leukocyte transendothelial migration	1	118	0.571114	0.846861	ko04670	ENSG00000005844	K05718
Metabolism	Global and overview maps	Carbon metabolism	1	123	0.586338	0.846861	ko01200	ENSG00000159322	K08074
Environmental Information Processing	Signal transduction	Sphingolipid signaling pathway	1	125	0.592278	0.846861	ko04071	ENSG00000282608	K04268
Cellular Processes	Cell growth and death	Cell cycle	1	129	0.603906	0.846861	ko04110	ENSG00000128245	K16198
Organismal Systems	Endocrine system	Thyroid hormone signaling pathway	1	129	0.603906	0.846861	ko04919	ENSG00000160563	K15170
Human Diseases	Cardiovascular diseases	Viral myocarditis	1	133	0.615209	0.846861	ko05416	ENSG00000005844	K05718
Cellular Processes	Cell growth and death	Oocyte meiosis	1	139	0.631571	0.846861	ko04114	ENSG00000128245	K16198
Organismal Systems	Immune system	Fc epsilon RI signaling pathway	1	141	0.636871	0.846861	ko04664	ENSG00000168918	K03084
Organismal Systems	Endocrine system	Estrogen signaling pathway	1	141	0.636871	0.846861	ko04915	ENSG00000096060	K09571
Genetic Information Processing	Translation	Ribosome	1	142	0.639493	0.846861	ko03010	ENSG00000108107	K02903
Cellular Processes	Cell growth and death	Apoptosis	1	142	0.639493	0.846861	ko04210	ENSG00000138794	K04396
Human Diseases	Cardiovascular diseases	Fluid shear stress and atherosclerosis	1	142	0.639493	0.846861	ko05418	ENSG00000114739	K13596
Genetic Information Processing	Transcription	Spliceosome	1	143	0.642096	0.846861	ko03040	ENSG00000136875	K12662
Genetic Information Processing	Folding, sorting and degradation	Ubiquitin mediated proteolysis	1	145	0.647248	0.846861	ko04120	ENSG00000100023	K10598
Environmental Information Processing	Signaling molecules and interaction	Cell adhesion molecules (CAMs)	1	153	0.667135	0.846861	ko04514	ENSG00000005844	K05718
Organismal Systems	Immune system	B cell receptor signaling pathway	1	155	0.671932	0.846861	ko04662	ENSG00000168918	K03084
Organismal Systems	Endocrine system	Oxytocin signaling pathway	1	159	0.681323	0.846861	ko04921	ENSG00000183049	K08794
Environmental Information Processing	Signal transduction	mTOR signaling pathway	1	163	0.69045	0.846861	ko04150	ENSG00000025039	K16186
Human Diseases	Endocrine and metabolic diseases	Cushing syndrome	1	163	0.69045	0.846861	ko04934	ENSG00000082482	K04913
Human Diseases	Infectious diseases	Hepatitis C	1	163	0.69045	0.846861	ko05160	ENSG00000128245	K16198
Human Diseases	Infectious diseases	Hepatitis B	1	167	0.699319	0.846861	ko05161	ENSG00000150455	K05403
Human Diseases	Immune diseases	Rheumatoid arthritis	1	167	0.699319	0.846861	ko05323	ENSG00000005844	K05718
Genetic Information Processing	Folding, sorting and degradation	Protein processing in endoplasmic reticulum	1	168	0.701497	0.846861	ko04141	ENSG00000152700	K07953
Organismal Systems	Immune system	Fc gamma R-mediated phagocytosis	1	170	0.705807	0.846861	ko04666	ENSG00000168918	K03084
Human Diseases	Cancers	Hepatocellular carcinoma	1	172	0.710055	0.846861	ko05225	ENSG00000099956	K11648
Human Diseases	Infectious diseases	Staphylococcus aureus infection	1	173	0.712157	0.846861	ko05150	ENSG00000005844	K05718
Environmental Information Processing	Signal transduction	cGMP - PKG signaling pathway	1	175	0.716315	0.846861	ko04022	ENSG00000282608	K04268
Environmental Information Processing	Signal transduction	NF-kappa B signaling pathway	1	178	0.722442	0.846861	ko04064	ENSG00000150455	K05403
Human Diseases	Infectious diseases	Influenza A	1	179	0.724455	0.846861	ko05164	ENSG00000114030	K23940
Organismal Systems	Immune system	NOD-like receptor signaling pathway	1	184	0.734308	0.846861	ko04621	ENSG00000085978	K17890
Organismal Systems	Development	Axon guidance	1	187	0.740053	0.846861	ko04360	ENSG00000187122	K06838
Organismal Systems	Immune system	Natural killer cell mediated cytotoxicity	1	188	0.741941	0.846861	ko04650	ENSG00000005844	K05718
Cellular Processes	Cell motility	Regulation of actin cytoskeleton	1	221	0.797208	0.881756	ko04810	ENSG00000005844	K05718
Environmental Information Processing	Signal transduction	cAMP signaling pathway	1	223	0.800155	0.881756	ko04024	ENSG00000179546	K04153
Environmental Information Processing	Signal transduction	Rap1 signaling pathway	1	226	0.804497	0.881756	ko04015	ENSG00000005844	K05718
Environmental Information Processing	Signal transduction	Phospholipase D signaling pathway	1	229	0.808746	0.881756	ko04072	ENSG00000122420	K04262
Human Diseases	Infectious diseases	HTLV-I infection	1	231	0.811528	0.881756	ko05166	ENSG00000005844	K05718
Cellular Processes	Transport and catabolism	Endocytosis	1	256	0.84312	0.899952	ko04144	ENSG00000077549	K10365
Human Diseases	Infectious diseases	Tuberculosis	1	257	0.844269	0.899952	ko05152	ENSG00000150455	K05403
Human Diseases	Cancers	Transcriptional misregulation in cancers	1	268	0.856374	0.899952	ko05202	ENSG00000119508	K08559
Human Diseases	Infectious diseases	Epstein-Barr virus infection	1	282	0.87045	0.899952	ko05169	ENSG00000005844	K05718
Human Diseases	Infectious diseases	Pathogenic Escherichia coli infection	1	285	0.873285	0.899952	ko05130	ENSG00000150455	K05403
Human Diseases	Neurodegenerative diseases	Huntington disease	1	288	0.876059	0.899952	ko05016	ENSG00000115073	K16575
Environmental Information Processing	Signaling molecules and interaction	Cytokine-cytokine receptor interaction	1	302	0.888235	0.904239	ko04060	ENSG00000114739	K13596
Human Diseases	Infectious diseases	Human papillomavirus infection	1	346	0.919342	0.92755	ko05165	ENSG00000131899	K06094
Environmental Information Processing	Signal transduction	PI3K-Akt signaling pathway	1	445	0.961538	0.961538	ko04151	ENSG00000128245	K16198
